# Supplementary material
Source: publisher figshare collection journal article supplement (https://rs.figshare.com/ndownloader/files/17143310)
Supplement: Supplementary file 1 [file 17143310]

## **Digit ratio (2D:4D) and prosocial behavior in economic games: No direct correlation with generosity, bargaining or trust-related behaviors**

Pablo Brañas-Garza, Antonio M. Espín, Teresa García-Muñoz & Jaromír Kovářik

### **Supplementary materials**

#### **Details on the protocol and analysis and Tables SM1-7**

##### **1) Details on the protocol and analysis**

###### *2D:4D measurement*

At the end of each session, both the left and right hands of all the participants were scanned using a high-resolution scanner (Canon Slide 90). The lengths of the index and ring fingers were measured from the scanned images as the distance from the middle of the basal crease to the tip of the finger using Photoshop (see Neyse and Brañas-Garza, 2014). Computer-assisted measurements of 2D:4D from scanned pictures have been found to be more precise and reliable than measurements using other methods (Allaway et al., 2009; Kemper and Schwerdtfeger, 2009). The 2D:4D of each hand was measured twice at an interval of one month by the same experienced researcher (not involved in this paper). These measurements displayed a high repeatability (right hand: intraclass correlation coefficient (ICC) = 0.957,  $p < 0.001$ , left hand: ICC = 0.944,  $p < 0.001$ ) and were averaged to obtain a single value of the 2D:4D ratio for each hand. As expected, the left-hand and right-hand 2D:4Ds were correlated within individuals ( $r = 0.67$ ,  $p < 0.001$  for males;  $r = 0.71$ ,  $p < 0.001$  for females; Pearson correlation) and males displayed lower 2D:4D than females (right-hand means [SD]:  $2D:4D_M = 0.960$  [0.033],  $2D:4D_F = 0.972$  [0.033],  $p < 0.001$ ; left-hand means:  $2D:4D_M = 0.965$  [0.032],  $2D:4D_F = 0.976$  [0.032],  $p < 0.001$ ; t-test).

### *Social behavior measurement - Economic games*

Our experiment consists of three canonical two-person games: the Dictator Game (hereafter ‘DG’), the Ultimatum Game (UG), and the Trust Game (TG). The games were faced by each participant in random order and all participants played both roles in each game. For each decision, participants would be matched with a different anonymous individual selected at random among the other participants.

In the DG, one player, the Dictator, had to divide €20 between herself and another anonymous participant, the Receiver, who could not but accept the offer. In our experiment, subjects were only allowed to propose the split in €2 increments. We employ the amount of money donated to the other participant (*DG offer*) as a measure of generosity. Although the role of Receiver is passive in the DG, to make sure that Dictators’ decisions affect others, the role of Receiver could have been selected for payment. That is, participants made five decisions but there existed six different roles for payment (and this was carefully explained to the participants).

In the UG (Güth et al., 1982; see Figure SM1), one player, the Proposer, had to propose a division of €20 between herself and another anonymous participant, the Responder, who—in contrast to the DG—could either accept or reject the proposal. If the latter accepted, the proposed division was implemented; in case of rejection, neither participant earned anything. Each subject participated in both roles. The *offer* made to the Responder will be our measure of Proposers’ bargaining behavior. For the role of Responder, we used the strategy method: each subject had to state her willingness to accept or reject each of the possible proposals without knowing the offer of the Proposer. Below, we employ the minimum acceptable offer (hereafter ‘*mao*’)—the minimum amount of money that a subject would accept—as our measure of Responders’ behavior. Such approach is common in the literature and the *mao* is typically interpreted as indicative for the Responder’s willingness to punish the (unfair)

Proposer at a personal cost (e.g. Fehr and Fischbacher, 2003; Henrich et al., 2005; Brañas-Garza et al., 2006).

**Figure SM1. Ultimatum (left) and Trust (right) Games in strategic form implemented in our study.** The figure shows the payments (in €) associated to each of the possible outcomes for the Proposer (Trustor) and Responder (Trustee) in the Ultimatum (Trust) Game. The Dictator Game only differs from the Ultimatum Game in that the rejection option does not exist in the second stage and the payoffs consequently are  $(20-X, X)$ .

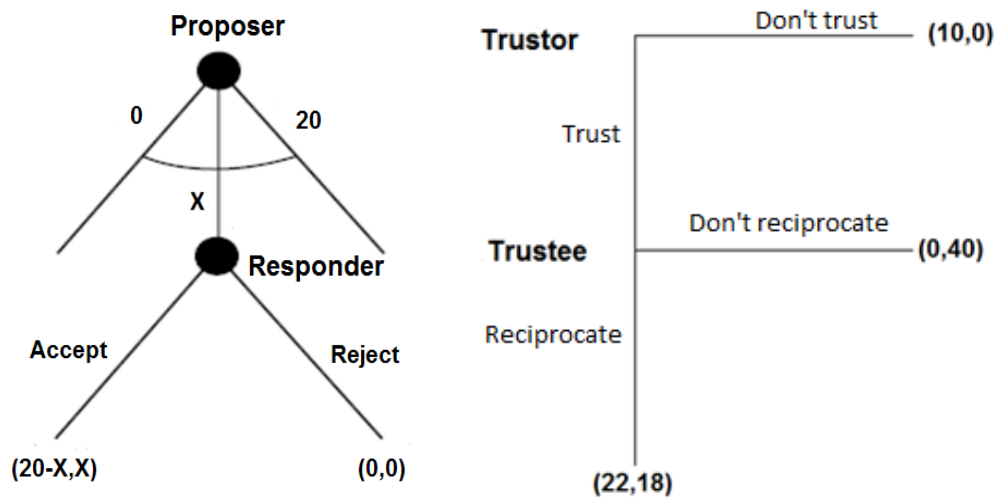

As for the TG, we employ a binary version of the game (Ermisch et al., 2009; Figure SM1) and again resort to the strategy method. More precisely, one player, the Trustor, had to decide whether to pass €10 or €0 to the Trustee. If she passed €0, the Trustor earned €10 and the Trustee nothing; if she rather passed €10 (i.e., the Trustor trusted the Trustee), the latter would receive  $4 \times €10 = €40$ . In such a case, the Trustee had to decide whether to either send back €22 and keep €18 for herself (that is, being trustworthy) or keep all €40 without sending anything back, in which case the Trustor would not earn anything. The Trustor's decision thus measures trust, whereas the Trustee's decision measures positive reciprocity. Figure 1

displays the extensive form of the TG implemented. In the analysis below,  $TG\ trust=1$  if the participant chose to pass the money to the Trustee and 0 otherwise. Similarly,  $TG\ reciprocity=1$  if as a Trustee the participant chose to return the money to the Trustor and 0 otherwise.

### *Additional variables*

As noted before, we administered all participants a survey eliciting a large amount of information (including *gender*, *age*, *household income*, *math skills*, and *social capital*). Besides we also include questions on life satisfaction, cognitive reflection and risk attitudes.

We measured participants' subjective well-being through the *life satisfaction* question (Zilioli et al., 2015; Espín et al., 2016b): “*In a scale from 1 to 7, where 1 means ‘completely unsatisfied’ and 7 means ‘completely satisfied’, in general, how satisfied are you with your life?’*”.

In addition, we also control for two measures of cognitive functioning. The first one is given by the number of correct responses in a simple *math* skills test (from 0 to 4). The second one measures the participants' tendency to *reflect* on their first intuition (i.e., their cognitive style, intuitive vs. reflective) and is given by the number of correct answers (from 0 to 3) in the Cognitive Reflection Test (Frederick, 2005). Cognitive skills and cognitive styles have been previously related to both social behaviors (Burks et al. 2009; Corgnet et al., 2015; Al-Ubaydli et al., 2016; Cabrales et al., 2017; Capraro et al., 2017) and 2D:4D (Brañas-Garza and Rustichini, 2011; Bosch-Domènech et al., 2014; Cueva et al., 2017) and thus represent potential confounding factors.

Social capital is measured using the so-called “trust question” from the General Social Survey and is included to control for the social environment where the participant typically interacts in daily life, i.e. whether people around can in general be trusted or not (binary

variable): “*Generally speaking, would you say that most people can be trusted or that you can’t be too careful in dealing with people?*”

Finally, our battery of controls includes three measures for participants’ *risk attitudes* obtained from a series of binary decisions involving (hypothetical) monetary lotteries. Risk attitudes may correlate with both social behavior (Bohnet and Zeckhauser, 2004; Corgnet et al., 2016) and 2D:4D (e.g. Brañas-Garza and Rustichini, 2011; Brañas-Garza et al., 2018).

### *Econometric analysis*

We first run a series of regression models. Our five social behavior measures (*DG offer*, *UG offer*, *UG mao*, *TG trust*, and *TG reciprocity*) are regressed on 2D:4D and 2D:4D-squared (*2D:4D-sq*; to test for non-linear relationships, e.g. Brañas-Garza et al., 2013). Additionally, since 2D:4D is sexually dimorphic, the relation between 2D:4D and behavioral traits is often gender-specific (e.g. Brañas-Garza and Rustichini, 2011), the adherence to sharing rules may differ across men and women (Croson and Gneezy, 2009; Espinosa and Kovářík, 2015), and testosterone affects men and women asymmetrically (Zethraeus et al., 2009; Eisenegger et al., 2010), we use a dummy variable to control for gender and the interaction between gender and either 2D:4D or 2D:4D-squared. The regressions are conducted both with and without other control variables and for both the left- and right-hand 2D:4D. The control variables are *order effects*, *age*, *income*, *life satisfaction*, *social capital*, *math*, *reflection*, and *risk attitudes*. We use Ordinary Least Squares regressions for *DG offer*, *UG offer*, and *UG mao*, and logistic regressions for *TG trust* and *TG reciprocity*.

The analysis was performed using Stata/SE 15.1 (StataCorp).

## 2) Supplementary Tables

**Table SM1. Descriptive statistics of 2D:4D, game outcomes and control variables**

| Variables          | Mean or<br>percentage | SD   | Min  | Max  |
|--------------------|-----------------------|------|------|------|
| Right 2D:4D        | 0.97                  | 0.03 | 0.87 | 1.09 |
| Left 2D:4D         | 0.97                  | 0.03 | 0.88 | 1.07 |
| Game outcomes      |                       |      |      |      |
| DG offer           | 8.26                  | 3.41 | 0    | 20   |
| UG offer           | 9.56                  | 1.67 | 0    | 20   |
| UG mao             | 6.00                  | 3.07 | 0    | 10   |
| TG trust (%)       | 69.29                 |      | 0    | 1    |
| TG reciprocity (%) | 79.11                 |      | 0    | 1    |
| Control variables  |                       |      |      |      |
| Male (%)           | 41.07                 |      | 0    | 1    |
| Age                | 17.97                 | 1.82 | 18   | 29   |
| Household income   | 2.13                  | 0.75 | 0    | 4    |
| Life satisfaction  | 5.68                  | 1.05 | 1    | 7    |
| Social capital (%) | 21.96                 |      | 0    | 1    |
| Math               | 2.46                  | 0.81 | 0    | 4    |
| Reflect (CRT)      | 0.72                  | 0.95 | 0    | 3    |
| Risk 1 (%)         | 9.82                  |      | 0    | 1    |
| Risk 2 (%)         | 33.04                 |      | 0    | 1    |
| Risk 3 (%)         | 11.96                 |      | 0    | 1    |
| Sample size        | 560                   |      |      |      |

**Note:** Percentages of cases ‘=1’ are displayed for binary variables (0/1)

**Table SM2. Bivariate relationships between all variables (Pearson, t-test and p-test)**

|                   | DG off  | UG offer | UG MAO              | TG trust          | TG Rec  | R 2D:4D              | L 2D:4D          |
|-------------------|---------|----------|---------------------|-------------------|---------|----------------------|------------------|
| UG offer          | 0.28*** |          |                     |                   |         |                      |                  |
| UG mao            | -0.03   | 0.09**   |                     |                   |         |                      |                  |
| TG trust          | 1.71*   | -0.28    | -1.79*              |                   |         |                      |                  |
| TG reciprocity    | 5.39*** | 1.68*    | -0.20               | 3.62***           |         |                      |                  |
| Right 2D:4D       | 0.06    | -0.02    | 0.00                | 0.25              | 0.18    |                      |                  |
| Left 2D:4D        | 0.07    | -0.02    | 0.01                | -0.47             | 0.49    | 0.70***              |                  |
| Male              | -0.07   | 0.71     | -0.89               | 1.42              | 0.87    | -4.50***             | -4.00***         |
| Age               | 0.02    | 0.02     | -0.03               | 1.18              | 0.08    | 0.06                 | 0.05             |
| Household income  | -0.00   | -0.01    | -0.07               | 0.67              | -0.35   | 0.00                 | -0.03            |
| Life satisfaction | -0.01   | -0.02    | 0.03                | 0.75              | 1.88*   | -0.03                | 0.01             |
| Social capital    | 1.37    | 1.32     | -1.26               | 1.06              | -0.83   | 0.97                 | 1.74*            |
| Math              | -0.06   | 0.03     | -0.06               | 0.15              | 2.35**  | -0.02                | 0.01             |
| Reflect (CRT)     | -0.04   | 0.03     | -0.06               | 0.30              | 1.29    | -0.16                | -0.13            |
| Risk 1            | 1.65    | -0.81    | 0.74                | 2.43**            | 0.87    | 1.31                 | 1.43             |
| Risk 2            | -0.71   | -1.70*   | -0.76               | 0.74              | -1.62   | 0.54                 | 0.59             |
| Risk 3            | 1.48    | -1.15    | -0.68               | 2.14**            | -1.28   | 0.03                 | -0.32            |
|                   | Male    | Age      | Household<br>income | Social<br>capital | Math    | Life<br>satisfaction | Reflect<br>(CRT) |
| Age               | 3.18*** |          |                     |                   |         |                      |                  |
| Household income  | 1.19    | -0.11*** |                     |                   |         |                      |                  |
| Social capital    | 3.42*** | 2.36**   | -0.85               |                   |         |                      |                  |
| Math              | 4.45*** | 0.03     | 0.00                | 1.39              |         |                      |                  |
| Life satisfaction | 2.67*** | -0.15*** | 0.11**              | 2.55**            | 0.09**  |                      |                  |
| Reflect (CRT)     | 4.61*** | -0.01    | -0.06               | 0.78              | 0.19*** | 0.02                 |                  |
| Risk 1            | 2.72*** | -0.30    | -0.38               | 1.00              | 1.04    | 1.32                 | 1.10             |
| Risk 2            | 2.19**  | -2.51**  | 1.60                | 1.82*             | 2.09**  | 0.65                 | 0.14             |
| Risk 3            | 1.72*   | -1.18    | 1.33                | 1.98**            | 0.24    | 2.39**               | -0.05            |
|                   | Risk 1  | Risk 2   |                     |                   |         |                      |                  |
| Risk 2            | 4.78*** |          |                     |                   |         |                      |                  |
| Risk 3            | 1.93*   | 3.28***  |                     |                   |         |                      |                  |

**Note:** Pearson correlation coefficients are displayed for the relationship between two continuous variables; for the relationship between a continuous and a binary variable, we report the t-statistic from t-tests (negative sign: 0>1, positive sign: 1>0; see Table SM1); for the relationship between two binary variables, we report the z-statistic from proportion tests (negative sign: negative relationship, positive sign: positive relationship). \*\*\*p<0.01, \*\*p<0.05, \*p<0.1

**Table SM3. DG offer as a function of 2D:4D**

| RIGHT HAND               |         |         |          |          |         |         |          |          |
|--------------------------|---------|---------|----------|----------|---------|---------|----------|----------|
| VARIABLES                | (1)     | (2)     | (3)      | (4)      | (5)     | (6)     | (7)      | (8)      |
| 2D:4D                    | 7.038*  | 5.717   | -177.111 | -121.709 | 3.197   | 1.927   | -251.985 | -216.667 |
|                          | (0.056) | (0.120) | (0.208)  | (0.387)  | (0.462) | (0.664) | (0.143)  | (0.202)  |
| Male                     | 0.070   | 0.005   | 0.058    | -0.005   | -9.046  | -8.914  | -37.451  | -62.821  |
|                          | (0.812) | (0.988) | (0.844)  | (0.987)  | (0.229) | (0.247) | (0.787)  | (0.671)  |
| 2D:4D <sup>2</sup>       |         |         | 94.754   | 65.543   |         |         | 130.738  | 111.933  |
|                          |         |         | (0.189)  | (0.364)  |         |         | (0.138)  | (0.199)  |
| 2D:4D *Male              |         |         |          |          | 9.449   | 9.248   | 65.609   | 118.630  |
|                          |         |         |          |          | (0.220) | (0.240) | (0.818)  | (0.697)  |
| 2D:4D <sup>2</sup> *Male |         |         |          |          |         |         | -27.678  | -55.411  |
|                          |         |         |          |          |         |         | (0.850)  | (0.723)  |
| Controls                 | no      | yes     | no       | yes      | no      | yes     | no       | yes      |
| Observations             | 560     | 560     | 560      | 560      | 560     | 560     | 560      | 560      |
| LEFT HAND                |         |         |          |          |         |         |          |          |
| VARIABLES                | (1)     | (2)     | (3)      | (4)      | (5)     | (6)     | (7)      | (8)      |
| 2D:4D                    | 7.504*  | 5.784   | -97.719  | -145.191 | 1.579   | 0.294   | -125.801 | -185.837 |
|                          | (0.084) | (0.166) | (0.642)  | (0.497)  | (0.759) | (0.953) | (0.622)  | (0.472)  |
| Male                     | 0.062   | -0.002  | 0.061    | -0.006   | -14.252 | -13.185 | 16.890   | 0.940    |
|                          | (0.833) | (0.995) | (0.835)  | (0.986)  | (0.106) | (0.139) | (0.931)  | (0.996)  |
| 2D:4D <sup>2</sup>       |         |         | 54.083   | 77.589   |         |         | 65.308   | 95.412   |
|                          |         |         | (0.616)  | (0.479)  |         |         | (0.619)  | (0.473)  |
| 2D:4D *Male              |         |         |          |          | 14.769  | 13.606  | -50.361  | -16.761  |
|                          |         |         |          |          | (0.101) | (0.134) | (0.900)  | (0.969)  |
| 2D:4D <sup>2</sup> *Male |         |         |          |          |         |         | 34.008   | 16.272   |
|                          |         |         |          |          |         |         | (0.868)  | (0.941)  |
| Controls                 | no      | yes     | no       | yes      | no      | yes     | no       | yes      |
| Observations             | 560     | 560     | 560      | 560      | 560     | 560     | 560      | 560      |

**Note:** Eight different models are estimated for the 2D:4D of each hand. Models labeled with even numbers include the following control variables: order effects, age, income, life satisfaction, social capital, math, reflection, and risk attitudes. Estimates of OLS regressions (p-values). \*\*\* p<0.01, \*\* p<0.05, \* p<0.1



**Table SM4. UG offer as a function of 2D:4D**

| RIGHT HAND               |                   |                   |                    |                    |                   |                   |                    |                     |
|--------------------------|-------------------|-------------------|--------------------|--------------------|-------------------|-------------------|--------------------|---------------------|
| VARIABLES                | (1)               | (2)               | (3)                | (4)                | (5)               | (6)               | (7)                | (8)                 |
| 2D:4D                    | -0.795<br>(0.685) | -0.754<br>(0.706) | 119.560<br>(0.103) | 99.483<br>(0.1429) | -19.49<br>(0.448) | -1.417<br>(0.577) | 66.154<br>(0.521)  | 48.608<br>(0.619)   |
| Male                     | 0.095<br>(0.529)  | 0.111<br>(0.531)  | 0.103<br>(0.496)   | 0.118<br>(0.503)   | -2.643<br>(0.494) | -1.464<br>(0.701) | -59.721<br>(0.420) | -61.474<br>(0.397)  |
| 2D:4D <sup>2</sup>       |                   |                   | -61.929<br>(0.100) | -51.559<br>(0.138) |                   |                   | -34.891<br>(0.508) | -25.629<br>(0.607)  |
| 2D:4D *Male              |                   |                   |                    |                    | 2.838<br>(0.475)  | 1.633<br>(0.675)  | 121.941<br>(0.425) | 126.595<br>(0.398)  |
| 2D:4D <sup>2</sup> *Male |                   |                   |                    |                    |                   |                   | -62.049<br>(0.430) | -64.970<br>(0.399)  |
| Controls                 | no                | yes               | no                 | yes                | no                | yes               | no                 | yes                 |
| Observations             | 560               | 560               | 560                | 560                | 560               | 560               | 560                | 560                 |
| LEFT HAND                |                   |                   |                    |                    |                   |                   |                    |                     |
| VARIABLES                | (1)               | (2)               | (3)                | (4)                | (5)               | (6)               | (7)                | (8)                 |
| 2D:4D                    | -1.016<br>(0.655) | -0.903<br>(0.703) | 40.589<br>(0.652)  | 31.333<br>(0.742)  | -3.306<br>(0.205) | -3.009<br>(0.244) | -45.680<br>(0.569) | -62.339<br>(0.492)  |
| Male                     | 0.094<br>(0.531)  | 0.110<br>(0.535)  | 0.094<br>(0.529)   | 0.111<br>(0.533)   | -5.440<br>(0.251) | -4.965<br>(0.297) | -91.337<br>(0.357) | -99.727<br>(0.375)  |
| 2D:4D <sup>2</sup>       |                   |                   | -21.384<br>(0.643) | -16.570<br>(0.733) |                   |                   | 21.725<br>(0.598)  | 30.412<br>(0.513)   |
| 2D:4D *Male              |                   |                   |                    |                    | 5.709<br>(0.240)  | 5.236<br>(0.281)  | 182.295<br>(0.370) | 200.627<br>(0.387)  |
| 2D:4D <sup>2</sup> *Male |                   |                   |                    |                    |                   |                   | -91.274<br>(0.384) | -100.610<br>(0.400) |
| Controls                 | no                | yes               | no                 | yes                | no                | yes               | no                 | yes                 |
| Observations             | 560               | 560               | 560                | 560                | 560               | 560               | 560                | 560                 |

**Note:** Eight different models are estimated for the 2D:4D of each hand. Models labeled with even numbers include the following control variables: order effects, age, income, life satisfaction, social capital, math, reflection, and risk attitudes. Estimates of OLS regressions (p-values). \*\*\* p<0.01, \*\* p<0.05, \* p<0.1

**Table SM5. UG MAO as a function of 2D:4D**

| RIGHT HAND               |                   |                   |                      |                     |                   |                   |                     |                     |
|--------------------------|-------------------|-------------------|----------------------|---------------------|-------------------|-------------------|---------------------|---------------------|
| VARIABLES                | (1)               | (2)               | (3)                  | (4)                 | (5)               | (6)               | (7)                 | (8)                 |
| 2D:4D                    | -0.525<br>(0.890) | -1.804<br>(0.621) | -104.860<br>(0.477)  | -37.509<br>(0.792)  | -1.910<br>(0.673) | -3.282<br>(0.455) | -79.306<br>(0.609)  | -44.706<br>(0.775)  |
| Male                     | -0.243<br>(0.367) | 0.033<br>(0.908)  | -0.250<br>(0.352)    | 0.030<br>(0.916)    | -3.531<br>(0.647) | -3.480<br>(0.636) | 54.744<br>(0.730)   | 11.729<br>(0.949)   |
| 2D:4D <sup>2</sup>       |                   |                   | 53.686<br>(0.479)    | 18.366<br>(0.802)   |                   |                   | 31.678<br>(0.618)   | 21.218<br>(0.791)   |
| 2D:4D *Male              |                   |                   |                      |                     | 3.408<br>(0.670)  | 3.641<br>(0.633)  | -118.279<br>(0.719) | -28.341<br>(0.930)  |
| 2D:4D <sup>2</sup> *Male |                   |                   |                      |                     |                   |                   | 63.439<br>(0.708)   | 16.785<br>(0.919)   |
| Controls                 | no                | yes               | no                   | yes                 | no                | yes               | no                  | yes                 |
| Observations             | 560               | 560               | 560                  | 560                 | 560               | 560               | 560                 | 560                 |
| LEFT HAND                |                   |                   |                      |                     |                   |                   |                     |                     |
| VARIABLES                | (1)               | (2)               | (3)                  | (4)                 | (5)               | (6)               | (7)                 | (8)                 |
| 2D:4D                    | 0.389<br>(0.920)  | -1.110<br>(0.773) | -317.134*<br>(0.075) | -185.407<br>(0.302) | 2.419<br>(0.617)  | 0.730<br>(0.880)  | -282.032<br>(0.197) | -166.678<br>(0.470) |
| Male                     | -0.231<br>(0.391) | 0.043<br>(0.880)  | -0.234<br>(0.384)    | 0.039<br>(0.891)    | 4.673<br>(0.551)  | 4.477<br>(0.554)  | 134.006<br>(0.851)  | 11.825<br>(0.949)   |
| 2D:4D <sup>2</sup>       |                   |                   | 163.201*<br>(0.076)  | 94.759<br>(0.306)   |                   |                   | 145.838<br>(0.195)  | 85.843<br>(0.470)   |
| 2D:4D *Male              |                   |                   |                      |                     | -5.060<br>(0.531) | -4.575<br>(0.558) | -67.432<br>(0.857)  | -20.782<br>(0.957)  |
| 2D:4D <sup>2</sup> *Male |                   |                   |                      |                     |                   |                   | 33.088<br>(0.864)   | 8.886<br>(0.964)    |
| Controls                 | no                | yes               | no                   | yes                 | no                | yes               | no                  | yes                 |
| Observations             | 560               | 560               | 560                  | 560                 | 560               | 560               | 560                 | 560                 |

**Note:** Eight different models are estimated for the 2D:4D of each hand. Models labeled with even numbers include the following control variables: order effects, age, income, life satisfaction, social capital, math, reflection, and risk attitudes. Estimates of OLS regressions (p-values). \*\*\* p<0.01, \*\* p<0.05, \* p<0.1

**Table SM6. TG trust as a function of 2D:4D**

| RIGHT HAND               |                   |                   |                    |                    |                   |                   |                      |                      |
|--------------------------|-------------------|-------------------|--------------------|--------------------|-------------------|-------------------|----------------------|----------------------|
| VARIABLES                | (1)               | (2)               | (3)                | (4)                | (5)               | (6)               | (7)                  | (8)                  |
| 2D:4D                    | 1.463<br>(0.594)  | 0.878<br>(0.760)  | -38.939<br>(0.733) | -31.118<br>(0.782) | 1.961<br>(0.573)  | 1.489<br>(0.679)  | -55.377<br>(0.692)   | -50.114<br>(0.721)   |
| Male                     | 0.287<br>(0.136)  | 0.124<br>(0.559)  | 0.284<br>(0.140)   | 0.122<br>(0.566)   | 1.544<br>(0.777)  | 1.662<br>(0.774)  | -25.762<br>(0.827)   | -32.615<br>(0.780)   |
| 2D:4D <sup>2</sup>       |                   |                   | 20.799<br>(0.723)  | 16.465<br>(0.776)  |                   |                   | 29.405<br>(0.682)    | 26.431<br>(0.713)    |
| 2D:4D *Male              |                   |                   |                    |                    | -1.304<br>(0.818) | -1.596<br>(0.790) | 54.763<br>(0.821)    | 68.952<br>(0.774)    |
| 2D:4D <sup>2</sup> *Male |                   |                   |                    |                    |                   |                   | -28.748<br>(0.818)   | -36.259<br>(0.770)   |
| Controls                 | no                | yes               | no                 | yes                | no                | yes               | no                   | Yes                  |
| Observations             | 560               | 560               | 560                | 560                | 560               | 560               | 560                  | 560                  |
| LEFT HAND                |                   |                   |                    |                    |                   |                   |                      |                      |
| VARIABLES                | (1)               | (2)               | (3)                | (4)                | (5)               | (6)               | (7)                  | (8)                  |
| 2D:4D                    | -0.690<br>(0.817) | -0.627<br>(0.597) | 172.769<br>(0.160) | 182.877<br>(0.147) | 0.879<br>(0.818)  | -0.011<br>(0.998) | 295.392*<br>(0.055)  | 292.150*<br>(0.061)  |
| Male                     | 0.260<br>(0.176)  | 0.092<br>(0.665)  | 0.263<br>(0.173)   | 0.092<br>(0.666)   | 4.292<br>(0.464)  | 4.265<br>(0.494)  | 154.786<br>(0.233)   | 137.625<br>(0.320)   |
| 2D:4D <sup>2</sup>       |                   |                   | -89.122<br>(0.158) | -94.812<br>(0.143) |                   |                   | -151.029*<br>(0.055) | -149.861*<br>(0.061) |
| 2D:4D *Male              |                   |                   |                    |                    | -4.158<br>(0.491) | -4.307<br>(0.502) | -313.274<br>(0.241)  | -278.120<br>(0.328)  |
| 2D:4D <sup>2</sup> *Male |                   |                   |                    |                    |                   |                   | 158.553<br>(0.248)   | 140.384<br>(0.336)   |
| Controls                 | no                | yes               | no                 | yes                | no                | yes               | no                   | yes                  |
| Observations             | 560               | 560               | 560                | 560                | 560               | 560               | 560                  | 560                  |

**Note:** Eight different models are estimated for the 2D:4D of each hand. Models labeled with even numbers include the following control variables: order effects, age, income, life satisfaction, social capital, math, reflection, and risk attitudes. Estimates of logistic regressions (p-values). \*\*\* p<0.01, \*\* p<0.05, \* p<0.1

**Table SM7. TG reciprocity as a function of 2D:4D**

| RIGHT HAND               |                  |                  |                     |                     |                     |                     |                     |                     |
|--------------------------|------------------|------------------|---------------------|---------------------|---------------------|---------------------|---------------------|---------------------|
| VARIABLES                | (1)              | (2)              | (3)                 | (4)                 | (5)                 | (6)                 | (7)                 | (8)                 |
| 2D:4D                    | 1.093<br>(0.707) | 1.696<br>(0.588) | -153.481<br>(0.220) | -178.953<br>(0.149) | -3.042<br>(0.416)   | -2.541<br>(0.529)   | -204.001<br>(0.218) | -253.795<br>(0.153) |
| Male                     | 0.197<br>(0.355) | 0.052<br>(0.828) | 0.187<br>(0.378)    | 0.035<br>(0.884)    | -10.587*<br>(0.070) | -10.932*<br>(0.072) | 48.031<br>(0.705)   | 59.753<br>(0.663)   |
| 2D:4D <sup>2</sup>       |                  |                  | 79.600<br>(0.216)   | 92.967<br>(0.146)   |                     |                     | 102.783<br>(0.224)  | 128.311<br>(0.156)  |
| 2D:4D *Male              |                  |                  |                     |                     | 11.204*<br>(0.065)  | 11.417*<br>(0.070)  | -114.918<br>(0.661) | -141.702<br>(0.618) |
| 2D:4D <sup>2</sup> *Male |                  |                  |                     |                     |                     |                     | 67.768<br>(0.616)   | 82.686<br>(0.574)   |
| Controls                 | no               | yes              | no                  | yes                 | no                  | yes                 | no                  | yes                 |
| Observations             | 560              | 560              | 560                 | 560                 | 560                 | 560                 | 560                 | 560                 |
| LEFT HAND                |                  |                  |                     |                     |                     |                     |                     |                     |
| VARIABLES                | (1)              | (2)              | (3)                 | (4)                 | (5)                 | (6)                 | (7)                 | (8)                 |
| 2D:4D                    | 2.105<br>(0.501) | 2.182<br>(0.527) | -126.253<br>(0.459) | -156.532<br>(0.392) | -0.573<br>(0.881)   | -0.893<br>(0.8349)  | -292.803<br>(0.240) | -355.024<br>(0.180) |
| Male                     | 0.206<br>(0.336) | 0.055<br>(0.821) | 0.206<br>(0.337)    | 0.054<br>(0.823)    | -6.833<br>(0.287)   | -8.055<br>(0.240)   | -163.398<br>(0.321) | -193.792<br>(0.273) |
| 2D:4D <sup>2</sup>       |                  |                  | 66.049<br>(0.452)   | 81.692<br>(0.386)   |                     |                     | 141.745<br>(0.243)  | 181.472<br>(0.183)  |
| 2D:4D *Male              |                  |                  |                     |                     | 7.279<br>(0.273)    | 8.392<br>(0.237)    | 328.816<br>(0.332)  | 389.684<br>(0.285)  |
| 2D:4D <sup>2</sup> *Male |                  |                  |                     |                     |                     |                     | -164.920<br>(0.344) | -195.486<br>(0.298) |
| Controls                 | no               | yes              | no                  | yes                 | no                  | yes                 | no                  | yes                 |
| Observations             | 560              | 560              | 560                 | 560                 | 560                 | 560                 | 560                 | 560                 |

**Note:** Eight different models are estimated for the 2D:4D of each hand. Models labeled with even numbers include the following control variables: order effects, age, income, life satisfaction, social capital, math, reflection, and risk attitudes. Estimates of logistic regressions (p-values). \*\*\* p<0.01, \*\* p<0.05, \* p<0.1

## References

- Allaway, H.C., Bloski, T.G., Pierson, R.A., & Lujan, M.E. (2009). Digit ratios (2D:4D) determined by computer-assisted analysis are more reliable than those using physical measurements, photocopies, and printed scans. *American Journal of Human Biology*, 21, 365-370.
- Al-Ubaydli, O., Jones, G., & Weel, J. (2016). Average player traits as predictors of cooperation in a repeated prisoner's dilemma. *Journal of Behavioral and Experimental Economics*, 64, 50-60.
- Bohnet, I., & Zeckhauser, R. (2004). Trust, risk and betrayal. *Journal of Economic Behavior & Organization*, 55(4), 467-484.
- Bosch-Domènech, A., Brañas-Garza, P., & Espín, A. M. (2014). Can exposure to prenatal sex hormones (2D: 4D) predict cognitive reflection? *Psychoneuroendocrinology*, 43, 1-10.
- Brañas-Garza, P., & Rustichini, A. (2011). Organizing effects of testosterone and economic behavior: Not just risk taking. *PLoS ONE*, 6(12), e29842.
- Brañas-Garza, P., Galizzi, M., & Nieboer, J. (2018). Experimental and self-reported measures of risk taking and digit ratio (2D: 4D): evidence from a large, systematic study. *International Economic Review*, 59(3), 1131-1157.
- Burks, S. V., Carpenter, J. P., Goette, L., & Rustichini, A. (2009). Cognitive skills affect economic preferences, strategic behavior, and job attachment. *Proceedings of the National Academy of Sciences*, 106(19), 7745-7750.
- Cabralles, A., Espín, A. M., Kujal, P., & Rassenti, S. (2017). Humans'(incorrect) distrust of reflective decisions.  
[https://papers.ssrn.com/sol3/papers.cfm?abstract\\_id=2945364](https://papers.ssrn.com/sol3/papers.cfm?abstract_id=2945364).
- Capraro, V., Corgnet, B., Espín, A. M., & Hernán-González, R. (2017). Deliberation favours social efficiency by making people disregard their relative shares: evidence from USA and India. *Royal Society Open Science*, 4(2), 160605.
- Corgnet, B., Espín, A. M., & Hernán-González, R. (2015). The cognitive basis of social behavior: cognitive reflection overrides antisocial but not always prosocial motives. *Frontiers in Behavioral Neuroscience*, 9, 287.

Croson, R., & Gneezy, U. (2009). Gender differences in preferences. *Journal of Economic Literature*, 47(2), 448-74.

Cueva, C., Iturbe-Ormaetxe, I., Mata-Pérez, E., Ponti, G., Sartarelli, M., Yu, H., & Zhukova, V. (2016). Cognitive (ir)reflection: New experimental evidence. *Journal of Behavioral and Experimental Economics*, 64, 81-93.

Eisenegger, C., Naef, M., Snozzi, R., Heinrichs, M., & Fehr, E. (2010). Prejudice and truth about the effect of testosterone on human bargaining behaviour. *Nature* 463, 356–359.

Ermisch, J., Gambetta, D., Laurie, H., Siedler, T., & Noah Uhrig, S. C. (2009). Measuring people's trust. *Journal of the Royal Statistical Society: Series A*, 172(4), 749-769.

Espinosa, M. P., & Kovářík, J. (2015). Prosocial behavior and gender. *Frontiers in Behavioral Neuroscience*, 9, 88.

Fehr, E., & Fischbacher, U. (2003). The nature of human altruism. *Nature*, 425(6960), 785.

Frederick, S. (2005). Cognitive reflection and decision making. *The Journal of Economic Perspectives*, 19(4), 25-42.

Henrich, J., Boyd, R., Bowles, S., Camerer, C., Fehr, E., Gintis, H., McElreath, R., Alvard, M., Barr, A., Ensminger, J. & Henrich, N. S. (2005). “Economic man” in cross-cultural perspective: Behavioral experiments in 15 small-scale societies. *Behavioral and Brain Sciences*, 28(6), 795-815.

Kemper, C.J., & Schwerdtfeger, A. (2009). Comparing indirect methods of digit ratio (2D:4D) measurement. *American Journal of Human Biology*, 21(2), 188–191

Manning, J. T., Baron-Cohen, S., Wheelwright, S., & Sanders, G. (2001). The 2nd to 4th digit ratio and autism. *Developmental Medicine and Child Neurology*, 43(3), 160-164.

Neyse, L. & Brañas-Garza, P. (2014): Digit Ratio Measurement Guide. *Munich Repository* 54134.

Zethraeus, N., Kocoska-Maras, L., Ellingsen, T., Von Schoultz, B. O., Hirschberg, A. L., & Johannesson, M. (2009). A randomized trial of the effect of estrogen and testosterone on economic behavior. *Proceedings of the National Academy of Sciences*, 106(16), 6535-6538
